# Supplementary material for: Adipose and Plasma microRNAs miR-221 and 222 Associate with Obesity, Insulin Resistance, and New Onset Diabetes after Peritoneal Dialysis
Source: MDPI journal article supplement (doi:10.3390/nu14224889), 2022-11-18
Supplement: s1 [file s1]

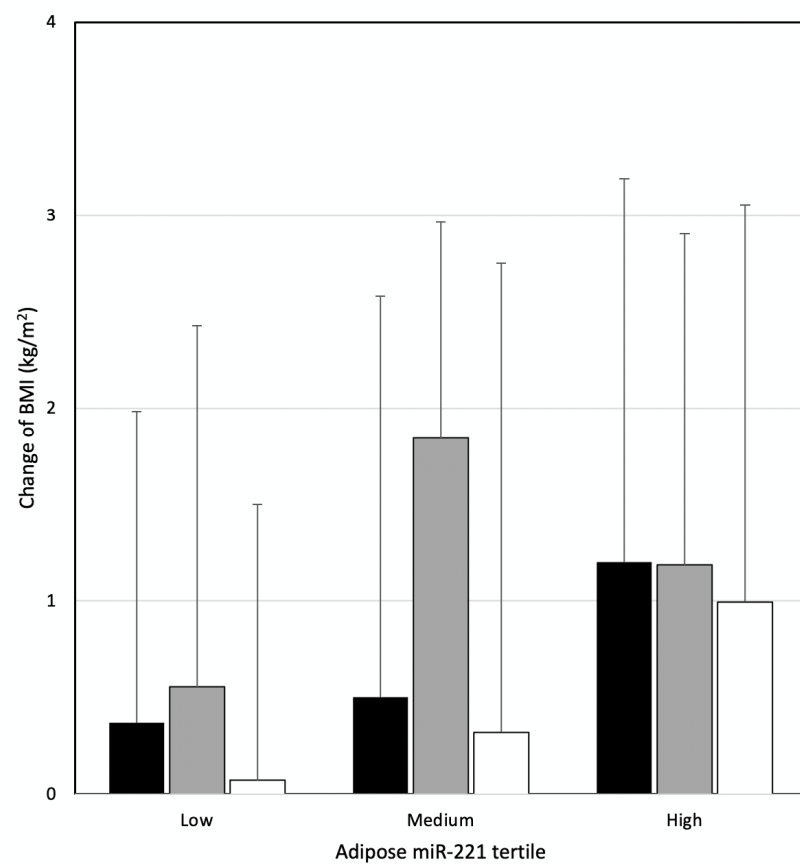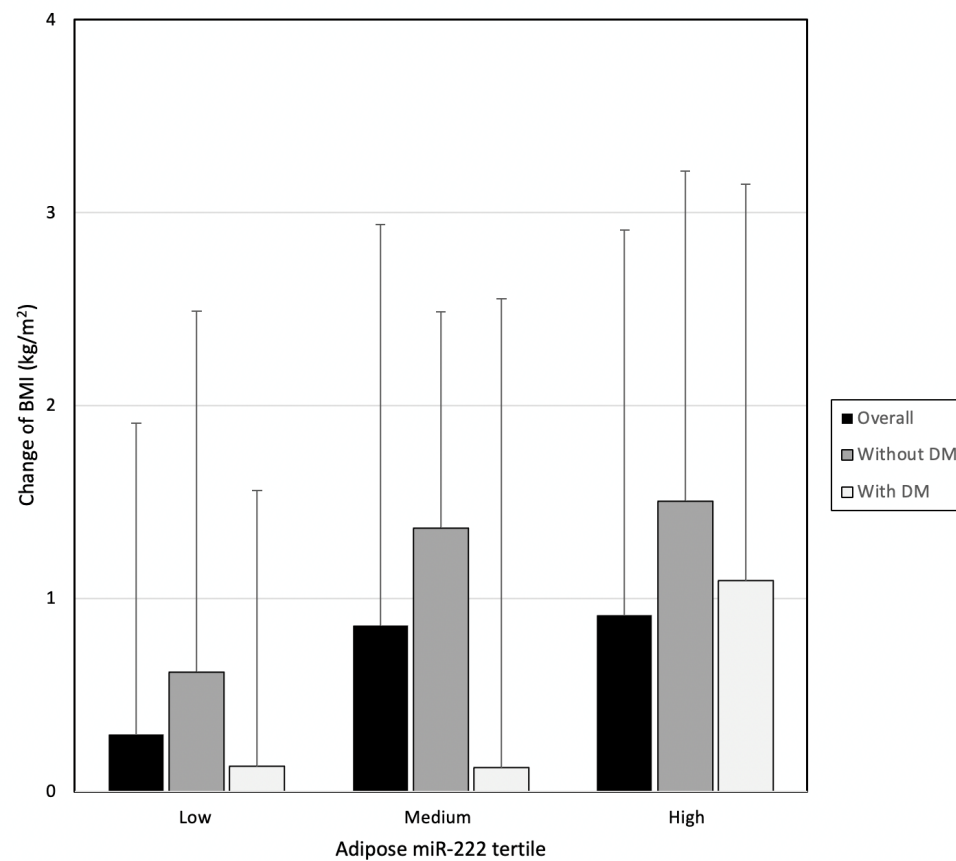

Supplementary Figure S1. BMI change according to adipose miR-221 & 222 tertiles.

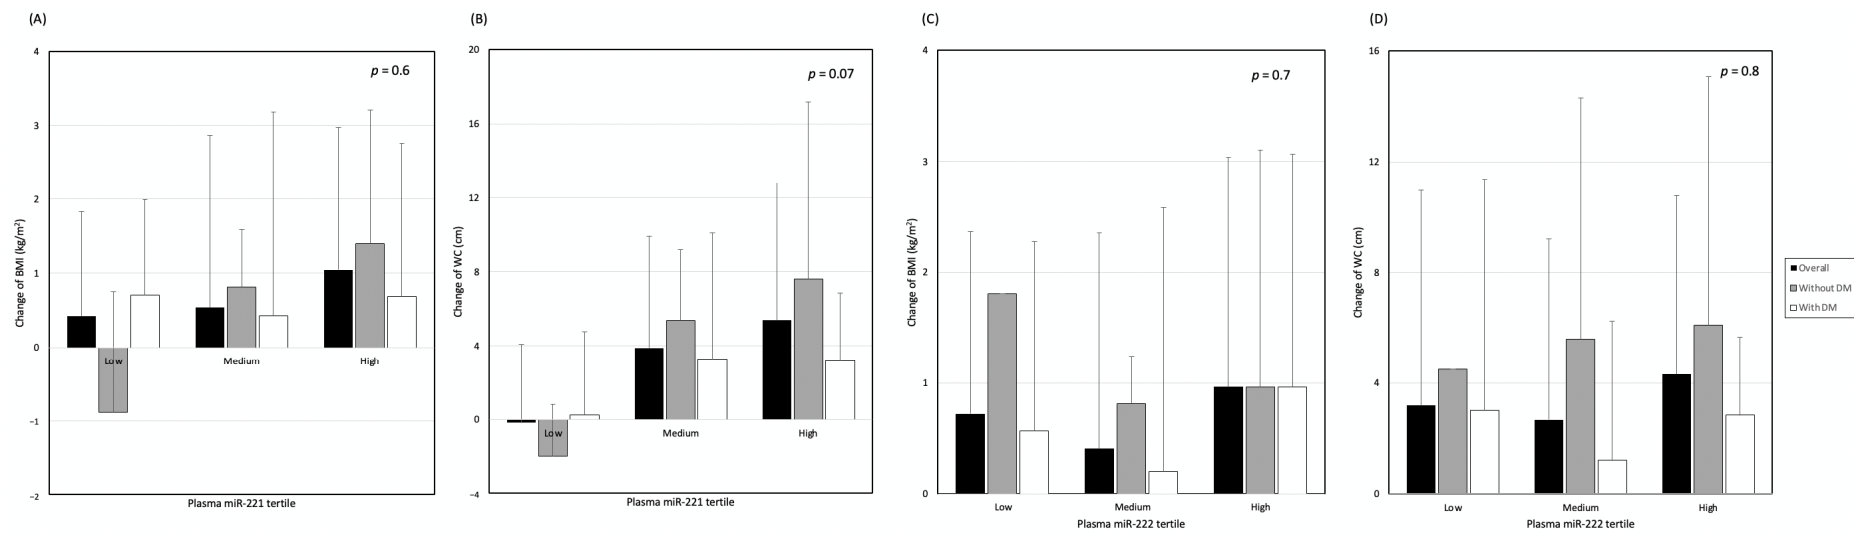

Supplementary Figure S2. BMI and WC changes according to plasma (A & B) miR-221 & (C & D) 222 tertiles.

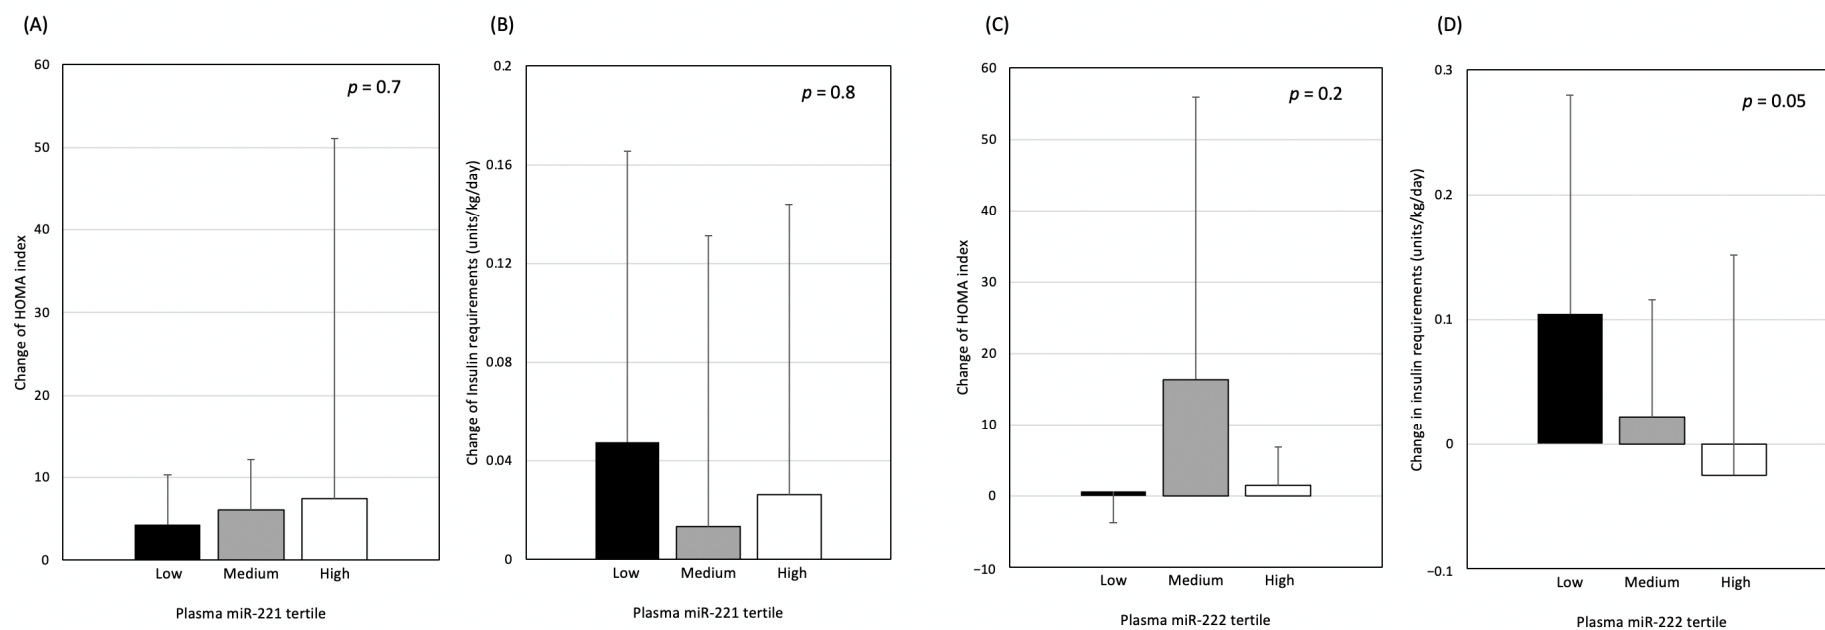

Supplementary Figure S3. HOMA and daily insulin requirements changes according to plasma (A & B) miR-221 & (C & D) 222 tertiles.

Supplementary Table S1. Correlations between miR-221 & 222 with plasma glycemic profile and nutrition.

|                 | miR-221                        |                                | miR-222                       |                                |
|-----------------|--------------------------------|--------------------------------|-------------------------------|--------------------------------|
|                 | Adipose                        | Plasma                         | Adipose                       | Plasma                         |
| Fasting glucose | $r = -0.03$<br>$p = \text{NS}$ | $r = -0.32$<br>$p = 0.02$      | $r = 0.01$<br>$p = \text{NS}$ | $r = -0.24$<br>$p = \text{NS}$ |
| HbA1c           | $r = 0.23$<br>$p = 0.005$      | $r = -0.33$<br>$p = 0.02$      | $r = 0.28$<br>$p = 0.001$     | $r = -0.31$<br>$p = 0.02$      |
| Fasting insulin | $r = 0.15$<br>$p = \text{NS}$  | $r = -0.04$<br>$p = \text{NS}$ | $r = 0.20$<br>$p = 0.015$     | $r = -0.25$<br>$p = \text{NS}$ |
| HOMA            | $r = 0.15$<br>$p = \text{NS}$  | $r = -0.14$<br>$p = \text{NS}$ | $r = 0.21$<br>$p = 0.01$      | $r = -0.03$<br>$p = 0.015$     |
| Albumin         | $r = 0.03$<br>$p = \text{NS}$  | $r = 0.36$<br>$p = 0.006$      | $r = 0.06$<br>$p = \text{NS}$ | $r = 0.30$<br>$p = 0.03$       |
| BMI             | $r = 0.06$<br>$p = \text{NS}$  | $r = 0.03$<br>$p = \text{NS}$  | $r = 0.1$<br>$p = \text{NS}$  | $r = 0.005$<br>$p = \text{NS}$ |
| WC              | $r = 0.05$<br>$p = \text{NS}$  | $r = -0.06$<br>$p = \text{NS}$ | $r = 0.08$<br>$p = \text{NS}$ | $r = 0.04$<br>$p = \text{NS}$  |

Data were compared by Spearman's rank correlation coefficient.

HbA1c, glycated haemoglobin A1c; HOMA, homeostatic model assessment; BMI, body mass index; WC, waist circumference; NS, not significant.

Supplementary Table S2. Clinical characteristics of patients developed new onset diabetes mellitus (NODM) after peritoneal dialysis.

|                                           | With NODM<br>( <i>n</i> = 26) | Without<br>NODM<br>( <i>n</i> = 35) | P-value                       |
|-------------------------------------------|-------------------------------|-------------------------------------|-------------------------------|
| Age                                       | 52.4 ± 15.4                   | 55.3 ± 10.8                         | <i>p</i> = 0.4 <sup>a</sup>   |
| Male sex, No. (%)                         | 19 (73.1%)                    | 21 (60.0%)                          | <i>p</i> = 0.3 <sup>b</sup>   |
| Primary renal disease                     |                               |                                     | <i>p</i> = 0.3 <sup>b</sup>   |
| Diabetes mellitus                         | 7 (26.9%)                     | 5 (14.3%)                           |                               |
| Hypertension                              | 11 (42.3%)                    | 16 (45.7%)                          |                               |
| Glomerulonephritis                        | 0 (0%)                        | 1 (2.9%)                            |                               |
| Polycystic kidney disease                 | 4 (15.4%)                     | 2 (5.7%)                            |                               |
| Urological                                | 0 (0%)                        | 2 (5.7%)                            |                               |
| Others                                    | 4 (15.4%)                     | 9 (25.7%)                           |                               |
| Comorbidities                             |                               |                                     |                               |
| Ischemic heart disease                    | 3 (11.5%)                     | 4 (11.4%)                           | <i>p</i> = 0.9 <sup>b</sup>   |
| Cerebrovascular accident                  | 5 (19.2%)                     | 4 (11.4%)                           | <i>p</i> = 0.4 <sup>b</sup>   |
| Charlson comorbidities index              | 4.2 ± 2.3                     | 4.3 ± 1.7                           | <i>p</i> = 0.9 <sup>a</sup>   |
| Residual GFR (ml/min/1.73m <sup>2</sup> ) | 3.4 ± 2.4                     | 2.9 ± 2.2                           | <i>p</i> = 0.5 <sup>a</sup>   |
| Laboratory parameters                     |                               |                                     |                               |
| Urea (mmol/L)                             | 28.1 ± 8.7                    | 33.4 ± 6.7                          | <i>p</i> = 0.01 <sup>a</sup>  |
| Creatinine (umol/L)                       | 908 ± 281                     | 931 ± 325                           | <i>p</i> = 0.8 <sup>a</sup>   |
| Albumin (g/L)                             | 34.6 ± 5.3                    | 37.1 ± 3.8                          | <i>p</i> = 0.048 <sup>a</sup> |
| High-sensitive C-reactive protein (mg/L)  | 22.2 ± 35.7                   | 9.9 ± 30.9                          | <i>p</i> = 0.2 <sup>a</sup>   |
| Peritoneal characteristics                |                               |                                     |                               |

|                          |             |             |                               |
|--------------------------|-------------|-------------|-------------------------------|
| D/P4                     | 0.69 ± 0.12 | 0.69 ± 0.11 | <i>p</i> = 0.9 <sup>a</sup>   |
| MTAC                     | 11.0 ± 5.6  | 11.6 ± 5.0  | <i>p</i> = 0.7 <sup>a</sup>   |
| Anthropometry            |             |             |                               |
| Body weight (kg)         | 66.3 ± 18.5 | 58.4 ± 10.2 | <i>p</i> = 0.05 <sup>a</sup>  |
| Body height (m)          | 163 ± 11    | 162 ± 8     | <i>p</i> = 0.7 <sup>a</sup>   |
| BMI (kg/m <sup>2</sup> ) | 24.7 ± 5.4  | 22.2 ± 3.1  | <i>p</i> = 0.04 <sup>a</sup>  |
| WC (cm)                  | 88.7 ± 13.5 | 79.9 ± 10.2 | <i>p</i> = 0.009 <sup>a</sup> |
| Glycemic profile         |             |             |                               |
| HbA1c (%)                | 5.5 ± 0.5   | 5.4 ± 0.4   | <i>p</i> = 0.6 <sup>a</sup>   |
| Fasting glucose (mmol/L) | 5.0 ± 0.8   | 4.8 ± 0.4   | <i>p</i> = 0.2 <sup>a</sup>   |
| Fasting insulin (mIU/L)  | 16.1 ± 14.1 | 11.2 ± 5.8  | <i>p</i> = 0.09 <sup>a</sup>  |
| C-peptide (ng/mL)        | 11.6 ± 9.4  | 9.1 ± 8.3   | <i>p</i> = 0.3 <sup>a</sup>   |
| HOMA                     | 3.5 ± 2.8   | 2.4 ± 1.4   | <i>p</i> = 0.07 <sup>a</sup>  |

Data are presented as mean ± standard deviation and compared by paired Student's *t* test<sup>a</sup> and chi-square test<sup>b</sup>.

NODM, new onset diabetes mellitus; GFR, glomerular filtration rate, D/P4, dialysate-to-plasma ratio of creatinine at 4 hours; MTAC, mass transfer area coefficient of creatinine; BMI, body mass index; WC, waist circumference; HbA1c, glycated haemoglobin A1c; HOMA, homeostatic model assessment.
